# Supplementary material
Source: PubMed Central journal article supplement (PMC10010479)

# DYADIC SLEEP AND CONTEXTUAL FACTORS

## Supplemental Figure 1.

*Actor-partner interdependence model*

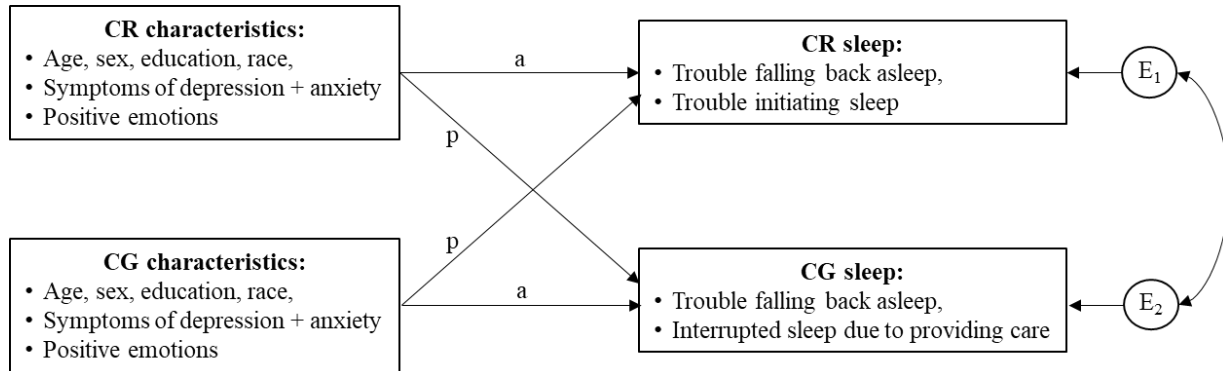

Supplement: gbac096_suppl_supplementary_figure_s1.pdf [file gbac096_suppl_supplementary_figure_s1.pdf]
